# Supplementary material for: Prescription of Long-Acting Injectable Antipsychotic Medications Among Outpatient Mental Health Care Service Providers
Source: Atypon-hosted journal article supplement (doi:10.1176/appi.ps.20220586), 2023-04-12
Supplement: appi.ps.20220586.ds001.pdf [file appi.ps.20220586.ds001.pdf]

**Supplemental Table 1.** Descriptive Analyses by Facility Type for Any Antipsychotic Utilization.

|                                        | Facility Utilized Any Antipsychotic |       |                              |       |                                |       |                                              |       |                                                |       |                                      |       |
|----------------------------------------|-------------------------------------|-------|------------------------------|-------|--------------------------------|-------|----------------------------------------------|-------|------------------------------------------------|-------|--------------------------------------|-------|
|                                        | Outpatient mental health facility   |       | Residential treatment center |       | Community mental health center |       | Certified community behavioral health clinic |       | Partial hospitalization/day treatment facility |       | Multi-setting mental health facility |       |
| <b>Facility Ownership</b>              | <i>n</i>                            | %     | <i>n</i>                     | %     | <i>n</i>                       | %     | <i>n</i>                                     | %     | <i>n</i>                                       | %     | <i>n</i>                             | %     |
| Private for-profit organization        | 510                                 | 40.2% | 100                          | 50.8% | 89                             | 51.1% | 9                                            | 52.9% | 64                                             | 43.2% | 47                                   | 52.2% |
| Private non-profit organization        | 1,565                               | 52.4% | 353                          | 58.9% | 1,234                          | 68.0% | 207                                          | 80.2% | 123                                            | 53.7% | 174                                  | 69.0% |
| Public agency or department            | 509                                 | 77.5% | 40                           | 65.6% | 461                            | 82.8% | 53                                           | 88.3% | 31                                             | 81.6% | 21                                   | 87.5% |
| <b>Treatment for SMI</b>               |                                     |       |                              |       |                                |       |                                              |       |                                                |       |                                      |       |
| No                                     | 1,223                               | 42.2% | 100                          | 47.2% | 470                            | 55.9% | 77                                           | 73.3% | 111                                            | 44.8% | 82                                   | 50.3% |
| Yes                                    | 1,340                               | 67.2% | 391                          | 61.0% | 1,309                          | 77.1% | 192                                          | 83.5% | 106                                            | 63.9% | 159                                  | 78.7% |
| <b>First Episode Psychosis Program</b> |                                     |       |                              |       |                                |       |                                              |       |                                                |       |                                      |       |
| No                                     | 2,072                               | 49.8% | 393                          | 53.5% | 1,294                          | 66.3% | 185                                          | 78.4% | 177                                            | 50.0% | 189                                  | 62.8% |
| Yes                                    | 491                                 | 67.4% | 98                           | 82.4% | 485                            | 82.8% | 84                                           | 84.8% | 40                                             | 66.7% | 52                                   | 81.3% |
| <b>Court Ordered Treatment</b>         |                                     |       |                              |       |                                |       |                                              |       |                                                |       |                                      |       |
| No                                     | 1,034                               | 49.8% | 332                          | 51.3% | 348                            | 58.3% | 56                                           | 61.5% | 147                                            | 48.7% | 93                                   | 60.4% |
| Yes                                    | 1,532                               | 54.4% | 159                          | 76.4% | 1,426                          | 73.6% | 213                                          | 87.3% | 70                                             | 63.1% | 149                                  | 70.3% |
| <b>Accepts Medicaid</b>                |                                     |       |                              |       |                                |       |                                              |       |                                                |       |                                      |       |
| No                                     | 139                                 | 33.4% | 81                           | 50.0% | 18                             | 45.0% | 2                                            | 50.0% | 48                                             | 43.2% | 20                                   | 46.5% |
| Yes                                    | 2,421                               | 54.3% | 410                          | 59.6% | 1,760                          | 70.5% | 266                                          | 80.6% | 167                                            | 55.5% | 219                                  | 68.4% |
| <b>Accepts Medicare</b>                |                                     |       |                              |       |                                |       |                                              |       |                                                |       |                                      |       |
| No                                     | 528                                 | 33.2% | 231                          | 50.2% | 144                            | 38.8% | 25                                           | 61.0% | 110                                            | 45.3% | 74                                   | 48.4% |
| Yes                                    | 2,032                               | 61.9% | 260                          | 66.7% | 1,634                          | 75.4% | 243                                          | 82.9% | 105                                            | 62.1% | 165                                  | 78.6% |
| <b>Accepts Private Insurance</b>       |                                     |       |                              |       |                                |       |                                              |       |                                                |       |                                      |       |
| No                                     | 437                                 | 47.0% | 214                          | 51.4% | 165                            | 61.6% | 15                                           | 71.4% | 22                                             | 35.5% | 32                                   | 61.5% |
| Yes                                    | 2,123                               | 53.9% | 277                          | 63.8% | 1,613                          | 71.1% | 253                                          | 80.8% | 193                                            | 55.1% | 207                                  | 66.6% |

Frequencies of facility characteristics organized by facility type for the facilities that indicated any antipsychotics, either oral or LAI were utilized (*n* = 5,590). SMI = serious mental illness.

**Supplemental Table 2.** Descriptive Analyses by Facility Type for Any LAI Antipsychotic Utilization.

|                                        | Facility Utilized Any LAI Antipsychotic |       |                              |       |                                |       |                                              |        |                                                |       |                                      |       |
|----------------------------------------|-----------------------------------------|-------|------------------------------|-------|--------------------------------|-------|----------------------------------------------|--------|------------------------------------------------|-------|--------------------------------------|-------|
|                                        | Outpatient mental health facility       |       | Residential treatment center |       | Community mental health center |       | Certified community behavioral health clinic |        | Partial hospitalization/day treatment facility |       | Multi-setting mental health facility |       |
|                                        | <i>n</i>                                | %     | <i>n</i>                     | %     | <i>n</i>                       | %     | <i>n</i>                                     | %      | <i>n</i>                                       | %     | <i>n</i>                             | %     |
| <b>Facility Ownership</b>              |                                         |       |                              |       |                                |       |                                              |        |                                                |       |                                      |       |
| Private for-profit organization        | 169                                     | 33.3% | 46                           | 46.5% | 26                             | 29.2% | 2                                            | 22.2%  | 20                                             | 31.3% | 10                                   | 21.3% |
| Private non-profit organization        | 673                                     | 43.2% | 189                          | 53.5% | 734                            | 59.5% | 117                                          | 56.5%  | 44                                             | 35.8% | 95                                   | 54.6% |
| Public agency or department            | 313                                     | 61.6% | 28                           | 70.0% | 356                            | 77.2% | 44                                           | 83.0%  | 6                                              | 19.4% | 13                                   | 61.9% |
| <b>Treatment for SMI</b>               |                                         |       |                              |       |                                |       |                                              |        |                                                |       |                                      |       |
| No                                     | 439                                     | 36.1% | 48                           | 48.5% | 242                            | 51.5% | 31                                           | 40.3%  | 19                                             | 17.1% | 22                                   | 26.8% |
| Yes                                    | 713                                     | 53.4% | 215                          | 55.0% | 873                            | 66.7% | 132                                          | 68.8%  | 51                                             | 48.1% | 96                                   | 60.4% |
| <b>First Episode Psychosis Program</b> |                                         |       |                              |       |                                |       |                                              |        |                                                |       |                                      |       |
| No                                     | 896                                     | 43.5% | 200                          | 51.0% | 813                            | 62.8% | 104                                          | 56.2%  | 58                                             | 32.8% | 82                                   | 43.4% |
| Yes                                    | 256                                     | 52.2% | 63                           | 64.3% | 302                            | 62.3% | 59                                           | 70.2%  | 12                                             | 30.0% | 36                                   | 69.2% |
| <b>Court Ordered Treatment</b>         |                                         |       |                              |       |                                |       |                                              |        |                                                |       |                                      |       |
| No                                     | 416                                     | 40.4% | 169                          | 51.1% | 187                            | 53.7% | 32                                           | 57.1%  | 39                                             | 26.5% | 36                                   | 38.7% |
| Yes                                    | 737                                     | 48.3% | 94                           | 59.1% | 924                            | 64.8% | 131                                          | 61.5%  | 31                                             | 44.3% | 82                                   | 55.0% |
| <b>Accepts Medicaid</b>                |                                         |       |                              |       |                                |       |                                              |        |                                                |       |                                      |       |
| No                                     | 47                                      | 34.1% | 36                           | 45.0% | 8                              | 44.4% | 2                                            | 100.0% | 11                                             | 22.9% | 3                                    | 15.0% |
| Yes                                    | 1,102                                   | 45.7% | 227                          | 55.4% | 1,106                          | 62.8% | 161                                          | 60.5%  | 59                                             | 35.3% | 114                                  | 52.1% |
| <b>Accepts Medicare</b>                |                                         |       |                              |       |                                |       |                                              |        |                                                |       |                                      |       |
| No                                     | 132                                     | 25.1% | 122                          | 53.0% | 40                             | 27.8% | 12                                           | 48.0%  | 23                                             | 20.9% | 14                                   | 18.9% |
| Yes                                    | 1,017                                   | 50.3% | 141                          | 54.2% | 1,074                          | 65.7% | 151                                          | 62.1%  | 47                                             | 44.8% | 103                                  | 62.4% |
| <b>Accepts Private Insurance</b>       |                                         |       |                              |       |                                |       |                                              |        |                                                |       |                                      |       |
| No                                     | 196                                     | 45.5% | 111                          | 51.9% | 92                             | 55.8% | 9                                            | 60.0%  | 7                                              | 31.8% | 18                                   | 56.3% |
| Yes                                    | 953                                     | 45.0% | 152                          | 55.1% | 1,022                          | 63.4% | 154                                          | 60.9%  | 63                                             | 32.6% | 99                                   | 47.8% |

Frequencies of facility characteristics organized by facility type for the facilities that indicated any LAI antipsychotic. Percentages are calculated utilizing the denominator criteria of a facility offering any antipsychotic therapy ( $n = 5,590$ ). SMI = serious mental illness.
